# Supplementary material for: Laboratory based synthesis of the pure form of gananite (BiF3) nanoparticles: a potential material for electrochemical supercapacitor application
Source: Royal Society of Chemistry journal article supplement (doi:10.1039/c9nj04573b), 2019-01-01
Supplement: c9nj04573b1.pdf [file c9nj04573b1.pdf]

**Figure S1:** Cyclic voltammograms of BiF<sub>3</sub> with 5wt% Carbon Black at different scan rates from 25 to 200 mV.s<sup>-1</sup>

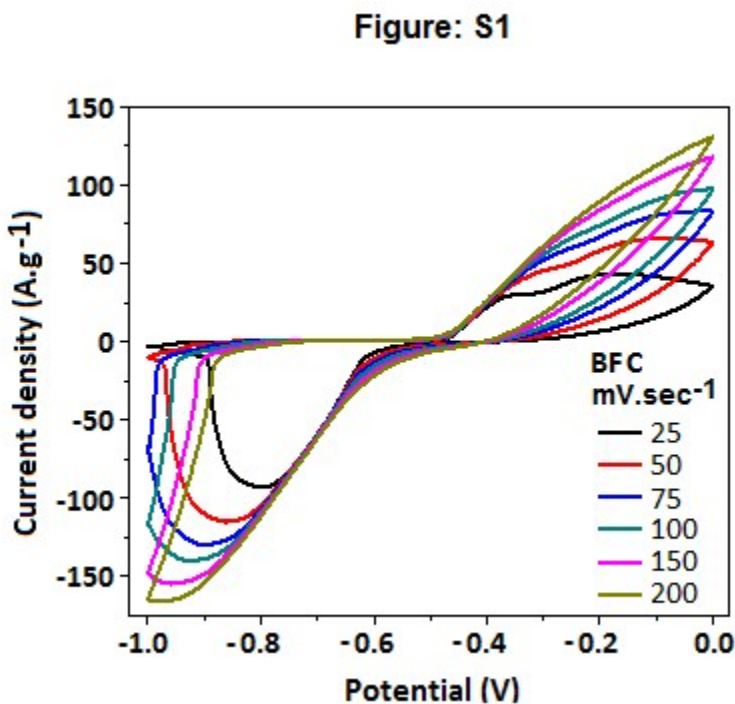

**Table S1:** The fitting parameters were extracted from the equivalent circuit model.

**Table: S2**

| Name of the compounds                                            | Specific capacitance (F/g) | Current density (A/g)   | Energy density (Wh/Kg) | Electrolyte                                             | References   |
|------------------------------------------------------------------|----------------------------|-------------------------|------------------------|---------------------------------------------------------|--------------|
| BiOCl                                                            | 124                        | 0.5 A/g                 | 17.2                   | KOH (6M)                                                | 1            |
| Bi <sub>2</sub> S <sub>3</sub> -Ni foam                          | 148.7                      | 1 A/g                   | 45.1                   | KOH (1M)                                                | 2            |
| Bi <sub>2</sub> O <sub>3</sub> -MnO <sub>2</sub>                 | 150.2                      | 1 A/g                   | 9.5                    | Na <sub>2</sub> SO <sub>4</sub> (1M)                    | 3            |
| rGO-BiVO <sub>4</sub>                                            | 151                        | 0.15 mA/cm <sup>2</sup> | 33.7                   | KOH (6M)                                                | 4            |
| Bi <sub>2</sub> S <sub>3</sub> -Poly-(3,4-ethylenedioxy pyrrole) | 201                        | 1 A/g                   | 100.5                  | 1-butyl-3-methyl imidazolium trifluoro-methanesulfonate | 5            |
| (Bi <sub>2</sub> O <sub>3</sub> )-Ni-foam                        | 322.5                      | 5 mV/s                  | 702.97                 | Na <sub>2</sub> SO <sub>4</sub> (1M)                    | 6            |
| GO-BiVO <sub>4</sub>                                             | 479                        | 5 A/g                   | 10.75                  | NaOH (2M)                                               | 7            |
| Bi <sub>2</sub> O <sub>3</sub> nanowires                         | 691.3                      | 2 A/g                   | 138.3                  | KOH (6M)                                                | 8            |
| rGO-BiFeO <sub>3</sub> Nanowire                                  | 928.43                     | 5 A/g                   | 18.62                  | KOH (3M)                                                | 9            |
| Bi <sub>2</sub> WO <sub>6</sub>                                  | 608                        | 0.5 mA/cm <sup>2</sup>  | 67                     | KOH (1M)                                                | 10           |
| BiF <sub>3</sub> -aniline                                        | 1127                       |                         | 313                    | KOH (1M)                                                | Present work |

**Table S2:** Some reported bismuth based materials for electrochemical supercapacitor application. rGO (reduced graphene oxide).

## References:

- 1 W. F. Hong, L. Wang, K. Liu, X. L. Han, Y. Zhou, P. Gao, R. Ding, E. H. Liu, *J. Alloys Compd.* **2018**, 746, 292-300.
- 2 X. G. Zhai, J. P. Gao, X. Y. Xu, W. Hong, H. Wang, F. M. Wu, Y. Liu, *J. Power Sources* **2018**, 396, 648-58.
- 3 C. H. Ng, H. N. Lim, S. Hayase, Z. Zainal, S. Shafie, N. M. Huang, *Ind. Eng. Chem. Res.* **2018**, 57, 2146-54.
- 4 S. S. Patil, D. P. Dubal, V. G. Deonikar, M. S. Tamboli, J. D. Ambekar, P. Gomez-Romero, S. S. Kolekar, B. B. Kale, D. R. Patil, *ACS Appl. Mater. Interfaces* **2016**, 8, 31602-10.
- 5 R. Mukkabila, M. Deepa, A. K. Srivastava, *Electrochim. Acta* **2015**, 164, 171-81.
- 6 R. C. Ambare, P. Shinde, U. T. Nakate, B. J. Lokhande, R. S. Mane, *Appl. Surf. Sci.* **2018**, 453, 214-9.
- 7 L. J. Deng, J. H. Liu, Z. Y. Ma, G. Fan, Z. H. Liu, *RSC Adv.* **2018**, 8, 24796-804.
- 8 Y. F. Qiu, H. B. Fan, X. Y. Chang, H. F. Dang, Q. Luo, Z. Y. Cheng, *Appl. Surf. Sci.* **2018**, 434, 16-20.
- 9 D. Moitra, C. Anand, B. Ghosh, M. Chandel, N. Ghosh, *ACS Appl. Energ. Mater.* **2018**, 1, 464-474.
- 10 V. D. Nithya, R. K. Selvan, D. Kalpana, L. Vasylechko, C. Sanjeeviraja, *Electrochim. Acta*, 2013, 109, 720-731.
